# Supplementary material
Source: publisher figshare collection journal article supplement (https://sage.figshare.com/ndownloader/files/14729216)
Supplement: Supplementary file 1 [file 14729216]

## Appendices

### Appendix 1

Table 5 Comparison of survey data and official statistics

|                                                                | Survey data in 2013 | Official statistics       |
|----------------------------------------------------------------|---------------------|---------------------------|
| <i><b>Educational attainment of working age population</b></i> |                     |                           |
| Below elementary                                               | 0.64%               | 1.0% <sup>a</sup>         |
| Elementary                                                     | 5.26%               | 9.0%                      |
| Junior secondary                                               | 33.59%              | 40.2%                     |
| Senior secondary                                               | 21.67%              | 21.5%                     |
| College or above                                               | 33.33%              | 28.3%                     |
| <i><b>Income per month</b></i>                                 | 3548.53 Yuan        | 3654.25 Yuan <sup>b</sup> |

## Appendix 2

Question asked to migrant residents: On a scale from 1-5 (where 1 is highly disagree and 5 is highly agree; 0 not applicable). Do you agree that the relationship with the majority of local Shanghai (*bendiren*) residents in this neighbourhood is:

- A) Friendly towards each other (*bici youshan*)
- B) Caring for each other (*huxiang zhaogu*)
- C) Trusting each other (*huxiang xinlai*)
- D) Familiar with each other (*shuluo liaojie*)

The same set of questions were asked to indigenous Shanghai residents in relation to their relationship with migrant (*waidiren*) residents in the same neighbourhood. The aim of these questions was to assess the relationship between migrant and local neighbours rather than sentiments towards the neighbourhood itself. Consequently we only adopted indicators from sense of community studies (i.e. Buckner 1988; Unger and Wandersman 1985), which were related to the affective relationship between residents (for instance “a feeling of fellowship runs deep between me and other people in this neighbourhood” from Buckner 1988:783).

With regards to the neighbouring activities both migrant and local respondents had to answer the following questions.

Question asked to migrant respondents: How do you normally interact with your local Shanghai (*bendiren*) neighbours?

- A) Visiting each other (*chuanmen/tanwang*); 1 (never), 2 (seldom), 3 (sometimes), 4 (often)
- B) Supporting each other (*huxiang bangzhu*); 1 (never), 2 (seldom), 3 (sometimes), 4 (often)
- C) Greeting each other (*jianmian da zhaohu*); 1 (never), 2 (seldom), 3 (sometimes), 4 (often)

Again the same set of questions was asked to local Shanghai respondents asking them about how they interact with migrant (*waidiren*) residents.
